# Supplementary material for: Redox-Regulated Magnetic Conversions between Ferro- and Antiferromagnetism in Organic Nitroxide Diradicals
Source: MDPI journal article supplement (doi:10.3390/molecules28176232), 2023-08-24
Supplement: s1 [file s1]

## Supporting Information

Fengying Zhang <sup>1,2,\*</sup>, Zijun Zhang <sup>3</sup>, Yali Zhao <sup>1,2,\*</sup>, Chao Du <sup>1,2</sup>, Yong Li <sup>1,2</sup>, Jiaqi Gao <sup>1,2</sup>, Xiaobo Ren <sup>1,2</sup>, Teng Ma <sup>1,2</sup>, Boqiong Li <sup>1,2</sup> and Yuxiang Bu <sup>4</sup>

<sup>1</sup> Department of Materials Science and Engineering, Jinzhong University, Jinzhong 030619, China; zx88dc@sina.com (C.D.); iytyut@126.com (Y.L.); gjq5207@outlook.com (J.G.); rxh@jzxy.edu.cn (X.R.); mateng1022@tyust.edu.cn (T.M.); lbq@jzxy.edu.cn (B.L.)

<sup>2</sup> Shanxi Province Collaborative Innovation Center for Light Materials Modification and Application, Jinzhong 030619, China

<sup>3</sup> Department of Chemistry and Chemical Engineering, Jinzhong University, Jinzhong 030619, China; 18334858404@163.com

<sup>4</sup> School of Chemistry and Chemical Engineering, Shandong University, Jinan 250100, China; byx@sdu.edu.cn

\* Correspondence: zfy13233005848@163.com (F.Z.); yaliz12@163.com (Y.Z.)

### 1. Relevant Data of Describing Ground States for All Designed Diradicals, Their Diradical Character and Magnetic Behaviors

**Table S1.** (U)B3LYP/6-311++G(d,p) level estimated energies (in a.u.) of the closed-shell (CS) singlet, broken-symmetry (BS) open-shell singlet and triplet (T) state, corresponding  $\langle S^2 \rangle$  values, intramolecular magnetic coupling constants ( $J$ , in  $\text{cm}^{-1}$ ) as well as S-T energy gaps ( $\Delta E_{\text{ST}}$ , kcal/mol) for all studied nitroxide-based diradicals

| Species   | $E_{\text{(CS)}}$ | $E_{\text{(BS)}} (\langle S^2 \rangle)$ | $E_{\text{(T)}} (\langle S^2 \rangle)$ | $J$     | $\Delta E_{\text{ST}}$ |
|-----------|-------------------|-----------------------------------------|----------------------------------------|---------|------------------------|
| <b>1a</b> | -641.4380263      | -641.4634223(1.034)                     | -641.4630648(2.082)                    | -74.8   | -0.44                  |
| <b>1b</b> | -642.6473530      | -642.6867238(1.005)                     | -642.6893172(2.036)                    | 551.6   | 3.21                   |
| <b>2a</b> | -795.1248350      | -795.1560298(1.035)                     | -795.1557353(2.054)                    | -63.4   | -0.37                  |
| <b>2b</b> | -796.3303225      | -796.3700529(1.014)                     | -796.3720239(2.050)                    | 417.2   | 2.44                   |
| <b>3a</b> | -948.8084098      | -948.8452382(1.026)                     | -948.8450641(2.034)                    | -37.9   | -0.22                  |
| <b>3b</b> | -950.0009064      | -950.0400077(1.022)                     | -950.0419894(2.087)                    | 408.0   | 2.43                   |
| <b>4a</b> | -1102.4838078     | -1102.5234243(1.031)                    | -1102.5233129(2.036)                   | -24.3   | -0.14                  |
| <b>4b</b> | -1103.6719639     | -1103.7118323(1.038)                    | -1103.7142024(2.157)                   | 464.5   | 2.86                   |
| <b>5a</b> | -1256.1593704     | -1256.2012445(1.036)                    | -1256.2011761(2.038)                   | -15.0   | -0.09                  |
| <b>5b</b> | -1257.3416378     | -1257.3807977(1.055)                    | -1257.3840817(2.304)                   | 576.6   | 3.79                   |
| <b>6a</b> | -1409.8314648     | -1409.8740725(1.050)                    | -1409.8740212(2.051)                   | -11.2   | -0.07                  |
| <b>6b</b> | -1411.0054185     | -1411.0494578(1.146)                    | -1411.0540885(2.517)                   | 740.7   | 5.33                   |
| <b>1c</b> | -524.2320891      | -524.2848499(1.009)                     | -524.2877531(2.033)                    | 621.7   | 3.61                   |
| <b>1d</b> | -525.4602392      | -525.4651502(0.768)                     | -525.4578212(2.036)                    | -1267.5 | -7.37                  |
| <b>2c</b> | -677.9224919      | -677.9653040(1.014)                     | -677.9670894(2.042)                    | 380.9   | 2.22                   |
| <b>2d</b> | -679.1392148      | -679.1531832(0.974)                     | -679.1503393(2.032)                    | -589.4  | -3.43                  |
| <b>3c</b> | -831.5986800      | -831.6375954(1.023)                     | -831.6392154(2.069)                    | 339.6   | 2.01                   |

|           |               |                      |                      |        |       |
|-----------|---------------|----------------------|----------------------|--------|-------|
| <b>3d</b> | -832.8271046  | -832.8500366(1.015)  | -832.8486393(2.028)  | -302.5 | -1.75 |
| <b>4c</b> | -985.2703056  | -985.3081681(1.036)  | -985.3100701(2.125)  | 383.0  | 2.32  |
| <b>4d</b> | -985.5017878  | -986.5314217(1.027)  | -986.5305793(2.029)  | -184.4 | -1.07 |
| <b>5c</b> | -1138.9406872 | -1138.9770855(1.059) | -1138.9796257(2.236) | 473.3  | 3.02  |
| <b>5d</b> | -1140.1774835 | -1140.2125906(1.033) | -1140.2121423(2.031) | -98.5  | -0.57 |
| <b>6c</b> | -1292.6097857 | -1292.6453885(1.096) | -1292.6491806(2.434) | 621.6  | 4.32  |
| <b>6d</b> | -1293.8491436 | -1293.8867316(1.045) | -1293.8864305(2.039) | -66.4  | -0.39 |

**Table S2.** (U)M06-2X/6-311++G(d,p) level estimated energies (in a.u.) of the broken-symmetry (BS) open-shell singlet and triplet (T) state, corresponding  $\langle S^2 \rangle$  values, intramolecular magnetic coupling constants ( $J$ , in  $\text{cm}^{-1}$ ) for all studied nitroxide-based diradicals

| <b>Species</b> | $E_{\text{(BS)}} (\langle S^2 \rangle)$ | $E_{\text{(T)}} (\langle S^2 \rangle)$ | $J$    |
|----------------|-----------------------------------------|----------------------------------------|--------|
| <b>1a</b>      | -641.2044049(1.065)                     | -641.2043554(2.089)                    | -10.6  |
| <b>1b</b>      | -642.4329108(1.010)                     | -642.4348843(2.034)                    | 422.6  |
| <b>2a</b>      | -794.8393614(1.048)                     | -794.8393233(2.057)                    | -8.5   |
| <b>2b</b>      | -796.0555291(1.019)                     | -796.0569467(2.046)                    | 302.7  |
| <b>3a</b>      | -948.4710141(1.030)                     | -948.4709925(2.034)                    | -4.7   |
| <b>3b</b>      | -949.6639157(1.026)                     | -949.6652353(2.073)                    | 276.4  |
| <b>4a</b>      | -1102.0882483(1.032)                    | -1102.0882310(2.034)                   | -3.8   |
| <b>4b</b>      | -1103.2734185(1.039)                    | -1103.2748595(2.123)                   | 291.5  |
| <b>5a</b>      | -1255.7050989(1.034)                    | -1255.7050882(2.035)                   | -2.3   |
| <b>5b</b>      | -1256.8795817(1.052)                    | -1256.8815429(2.246)                   | 360.2  |
| <b>6a</b>      | -1409.3160678(1.042)                    | -1409.3160602(2.043)                   | -1.7   |
| <b>6b</b>      | -1410.4853052(1.090)                    | -1410.4883008(2.483)                   | 471.6  |
| <b>1c</b>      | -524.0739089(1.012)                     | -524.0763106(2.034)                    | 515.3  |
| <b>1d</b>      | -525.2441507(0.994)                     | -525.2406114(2.039)                    | -742.7 |
| <b>2c</b>      | -677.6928119(1.018)                     | -677.6941157(2.039)                    | 280.0  |
| <b>2d</b>      | -678.8748725(1.033)                     | -678.8736934(2.034)                    | -258.3 |
| <b>3c</b>      | -831.3019635(1.027)                     | -831.3030659(2.060)                    | 234.0  |
| <b>3d</b>      | -832.5121497(1.033)                     | -832.5116849(2.029)                    | -102.3 |
| <b>4c</b>      | -984.9101606(1.039)                     | -984.9113111(2.097)                    | 238.5  |
| <b>4d</b>      | -986.1328909(1.033)                     | -986.1325996(2.029)                    | -64.1  |
| <b>5c</b>      | -1138.5159686(1.056)                    | -1138.5174119(2.176)                   | 282.6  |
| <b>5d</b>      | -1139.7535376(1.033)                    | -1139.7533716(2.030)                   | -36.5  |
| <b>6c</b>      | -1292.1212049(1.080)                    | -1292.1233559(2.352)                   | 370.8  |

|           |                      |                      |       |
|-----------|----------------------|----------------------|-------|
| <b>6d</b> | -1293.3659531(1.040) | -1293.3658228(2.036) | -28.7 |
|-----------|----------------------|----------------------|-------|

**Table S3.** (U)B3LYP/6-311++G(d,p) level estimated energies (in a.u.) of the broken-symmetry (BS) open-shell singlet and triplet (T) state, corresponding  $\langle S^2 \rangle$  values, intramolecular magnetic coupling constants ( $J$ , in  $\text{cm}^{-1}$ ) for four couples of bis(tert-butyl)-nitroxide-based diradicals

| Species    | $E_{\text{(BS)}} (\langle S^2 \rangle)$ | $E_{\text{(T)}} (\langle S^2 \rangle)$ | $J$    |
|------------|-----------------------------------------|----------------------------------------|--------|
| <b>2a'</b> | -1109.7289295(1.023)                    | -1109.7285674(2.041)                   | -78.0  |
| <b>2b'</b> | -1110.9444029(1.014)                    | -1110.9449151(2.025)                   | 111.1  |
| <b>3a'</b> | -1263.4271834(1.022)                    | -1263.4269754(2.030)                   | -45.2  |
| <b>3b'</b> | -1264.6185796(1.021)                    | -1264.6201755(2.074)                   | 332.3  |
| <b>2c'</b> | -992.5502641(1.012)                     | -992.5516567(2.036)                    | 298.2  |
| <b>2d'</b> | -993.7322030(0.990)                     | -993.7301652(2.028)                    | -430.5 |
| <b>3c'</b> | -1146.2180983(1.019)                    | -1146.2194055(2.059)                   | 275.6  |
| <b>3d'</b> | -1147.4265221(1.019)                    | -1147.4255500(2.024)                   | -212.1 |

## 2. HOMO and LUMO Energy Levels and HOMO-LUMO Gaps of Couplers for Ferromagnetic Diradicals

**Table S4.** The HOMO and LUMO energy levels (in a.u.) as well as HOMO-LUMO energy gaps (in eV) of the couplers for **1b**, **2b**, **3b**, **4b**, **5b**, **6b**, **1c**, **2c**, **3c**, **4c**, **5c** and **6c**

| Species   | HOMO     | LUMO     | HOMO-LUMO gap |
|-----------|----------|----------|---------------|
| <b>1b</b> | -0.21624 | -0.02532 | 5.19          |
| <b>2b</b> | -0.20364 | -0.04993 | 4.18          |

|           |          |          |      |
|-----------|----------|----------|------|
| <b>3b</b> | -0.18824 | -0.07304 | 3.13 |
| <b>4b</b> | -0.17981 | -0.08907 | 2.47 |
| <b>5b</b> | -0.17194 | -0.09962 | 1.97 |
| <b>6b</b> | -0.16691 | -0.10785 | 1.61 |
| <b>1c</b> | -0.26357 | -0.06933 | 5.29 |
| <b>2c</b> | -0.25900 | -0.08638 | 4.70 |
| <b>3c</b> | -0.23666 | -0.10346 | 3.62 |
| <b>4c</b> | -0.21393 | -0.11366 | 2.73 |
| <b>5c</b> | -0.20275 | -0.12250 | 2.18 |
| <b>6c</b> | -0.19179 | -0.12798 | 1.74 |

### 3. SOMO Energies, SOMO-SOMO Energy Gaps of Triplet States and S-T Energy Gaps of All Diradicals

**Table S5.** The SOMO energies (a.u.) of the triplet states, SOMO-SOMO energy gaps ( $\Delta E_{SS}$  in eV) and singlet-triplet energy gaps ( $\Delta E_{ST}$  in kcal/mol) of **1a**, **1b**, **2a**, **2b**, **3a**, **3b**, **4a**, **4b**, **5a**, **5b**, **6a**, **6b**, **1c**, **1d**, **2c**, **2d**, **3c**, **3d**, **4c**, **4d**, **5c**, **5d**, **6c** and **6d**

| Species   | $^1E_S$  | $^2E_S$  | $\Delta E_{SS}$ | $\Delta E_{ST}$ |
|-----------|----------|----------|-----------------|-----------------|
| <b>1a</b> | -0.26895 | -0.25176 | 0.47            | -0.44           |
| <b>1b</b> | -0.22440 | -0.22309 | 0.04            | 3.21            |
| <b>2a</b> | -0.25497 | -0.23599 | 0.52            | -0.37           |
| <b>2b</b> | -0.21725 | -0.20529 | 0.33            | 2.44            |
| <b>3a</b> | -0.23748 | -0.22857 | 0.24            | -0.22           |
| <b>3b</b> | -0.21282 | -0.19715 | 0.43            | 2.43            |
| <b>4a</b> | -0.23136 | -0.22176 | 0.26            | -0.14           |
| <b>4b</b> | -0.20879 | -0.19062 | 0.49            | 2.86            |
| <b>5a</b> | -0.22320 | -0.21825 | 0.13            | -0.09           |
| <b>5b</b> | -0.20630 | -0.18635 | 0.54            | 3.79            |
| <b>6a</b> | -0.21973 | -0.21214 | 0.21            | -0.07           |
| <b>6b</b> | -0.20370 | -0.18369 | 0.54            | 5.33            |
| <b>1c</b> | -0.25389 | -0.24039 | 0.37            | 3.61            |
| <b>1d</b> | -0.22052 | -0.18064 | 1.09            | -7.37           |
| <b>2c</b> | -0.23978 | -0.22624 | 0.37            | 2.22            |
| <b>2d</b> | -0.21425 | -0.17891 | 0.96            | -3.43           |
| <b>3c</b> | -0.22591 | -0.21998 | 0.16            | 2.01            |
| <b>3d</b> | -0.20933 | -0.17656 | 0.89            | -1.75           |
| <b>4c</b> | -0.20749 | -0.19857 | 0.24            | 2.32            |
| <b>4d</b> | -0.20479 | -0.17773 | 0.74            | -1.07           |

|           |          |          |      |       |
|-----------|----------|----------|------|-------|
| <b>5c</b> | -0.21143 | -0.21064 | 0.02 | 3.02  |
| <b>5d</b> | -0.20318 | -0.18038 | 0.62 | -0.57 |
| <b>6c</b> | -0.20983 | -0.20463 | 0.14 | 4.32  |
| <b>6d</b> | -0.19871 | -0.18186 | 0.46 | -0.39 |

#### 4. Optimized Molecular Geometries for Ground States of All Diradicals

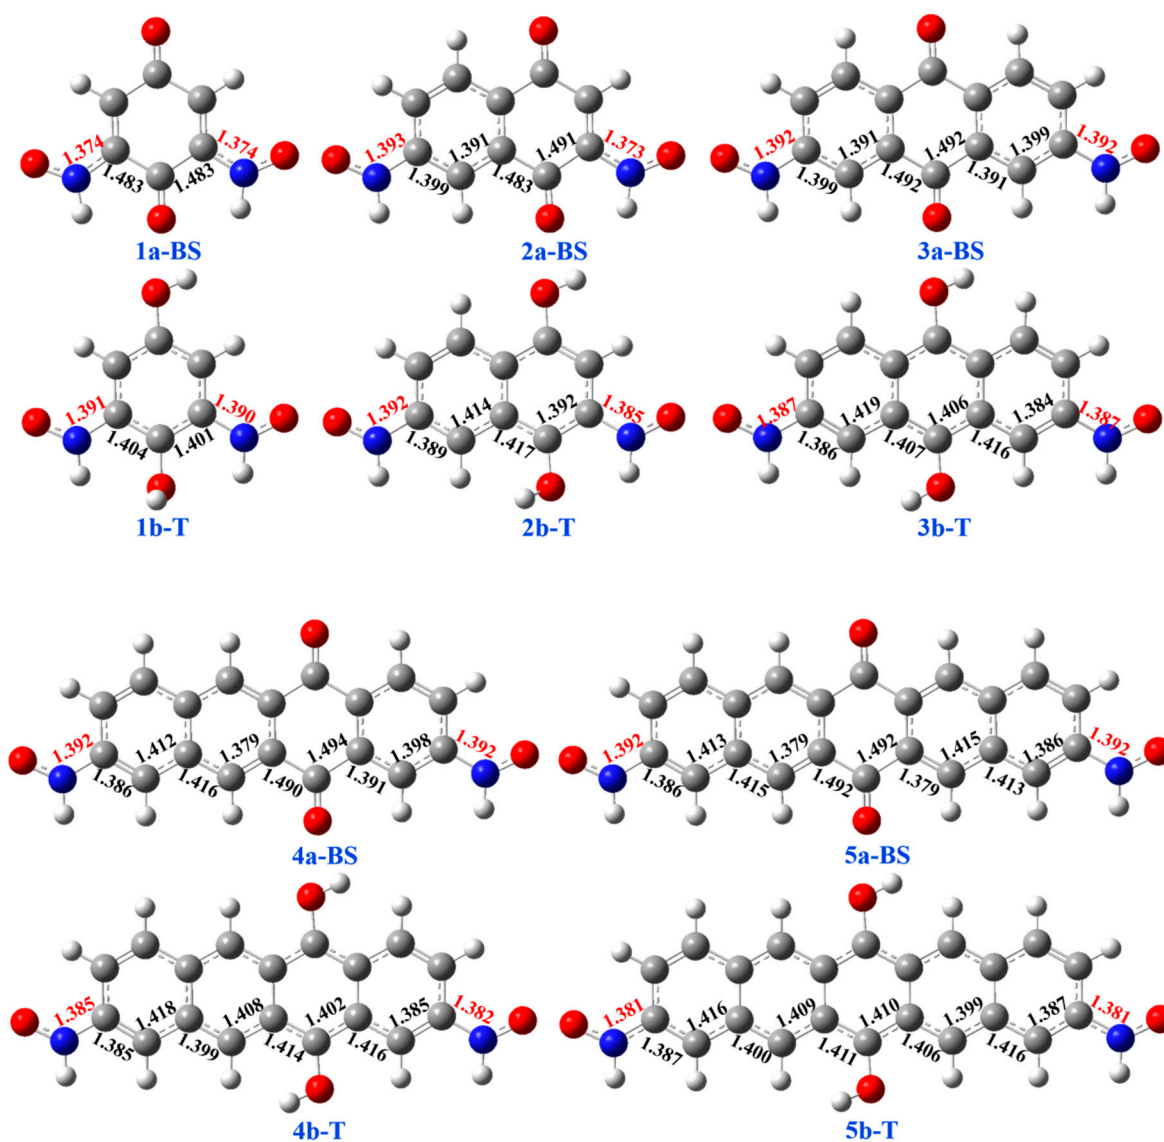

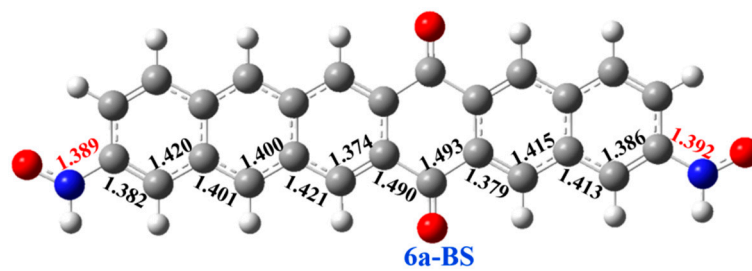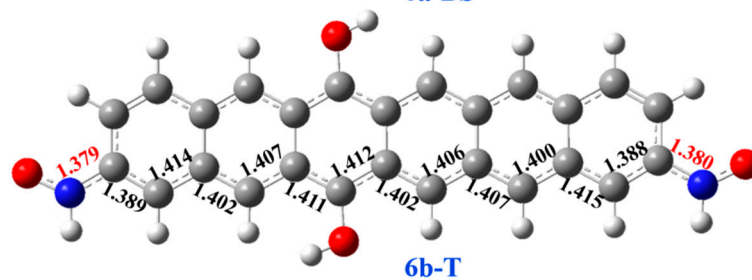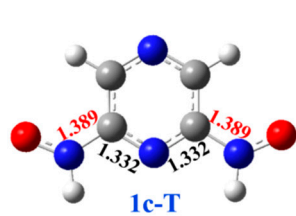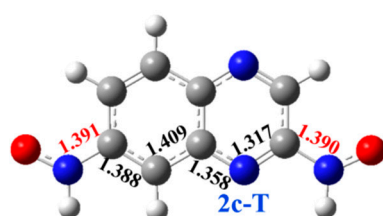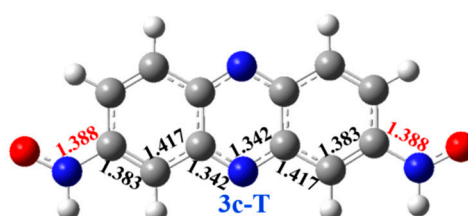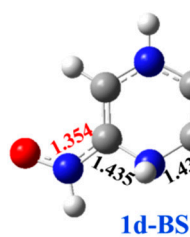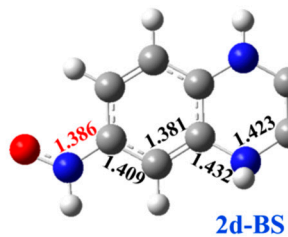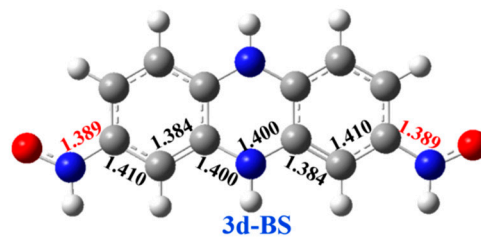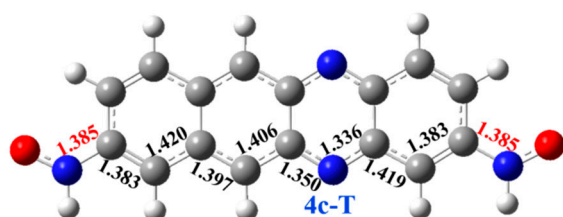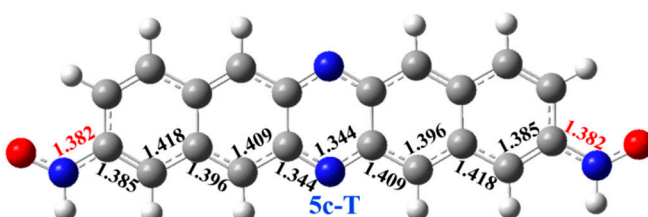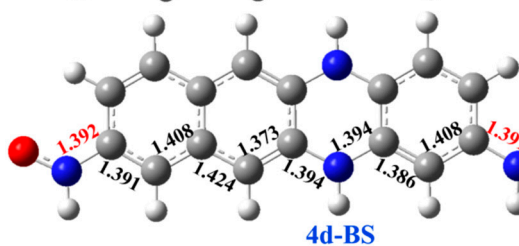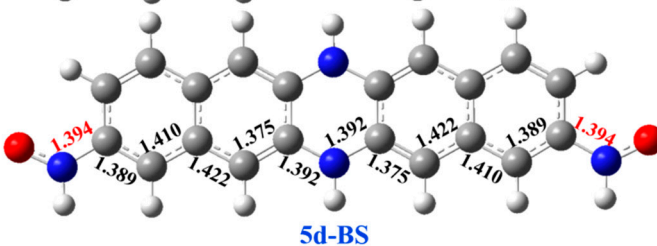

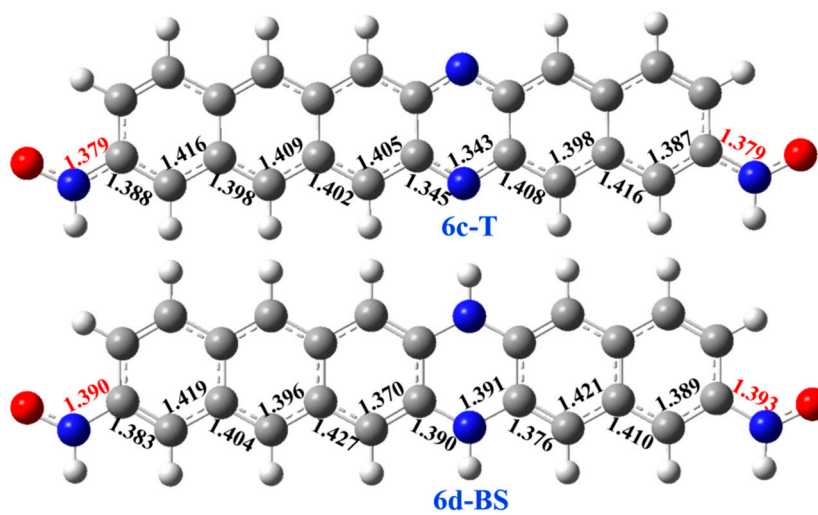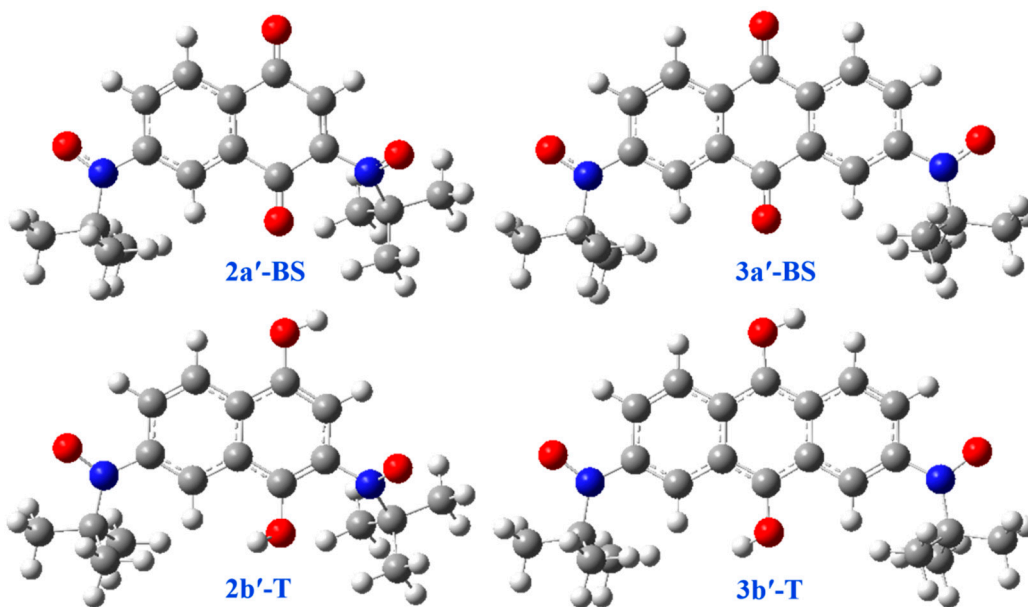

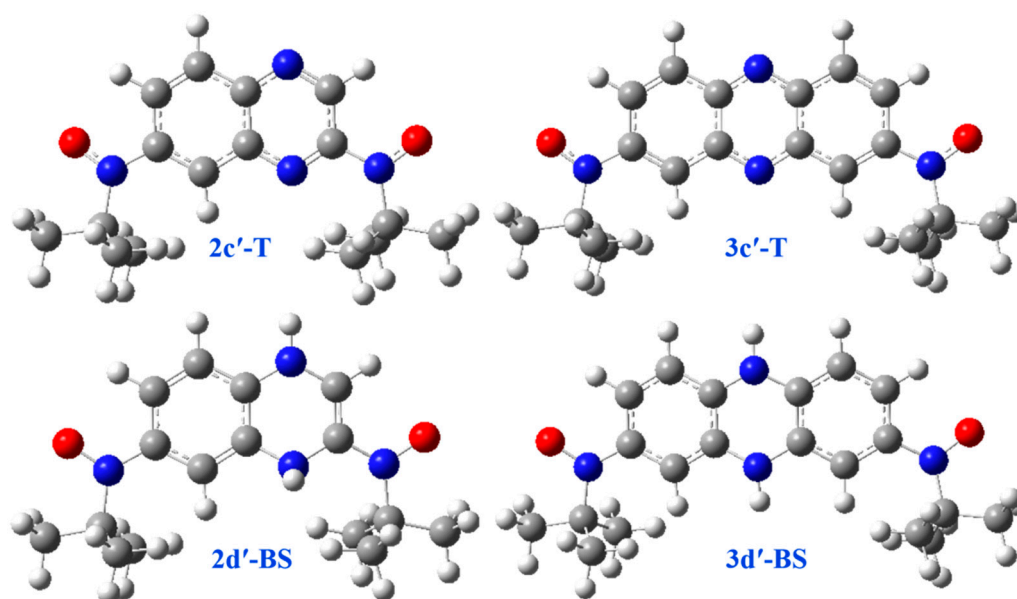

**Figure S1.** Optimized geometries for the ground states of all diradicals at the (U)B3LYP/6-311++G (d,p) level, including the bond lengths of the adjacent atoms between two spin centers of the nitroxide-based diradicals. Their linking bond lengths between the coupler and two spin centers are marked in red.

## 5. Distributions of Mulliken Atomic Spin Density of All Diradicals

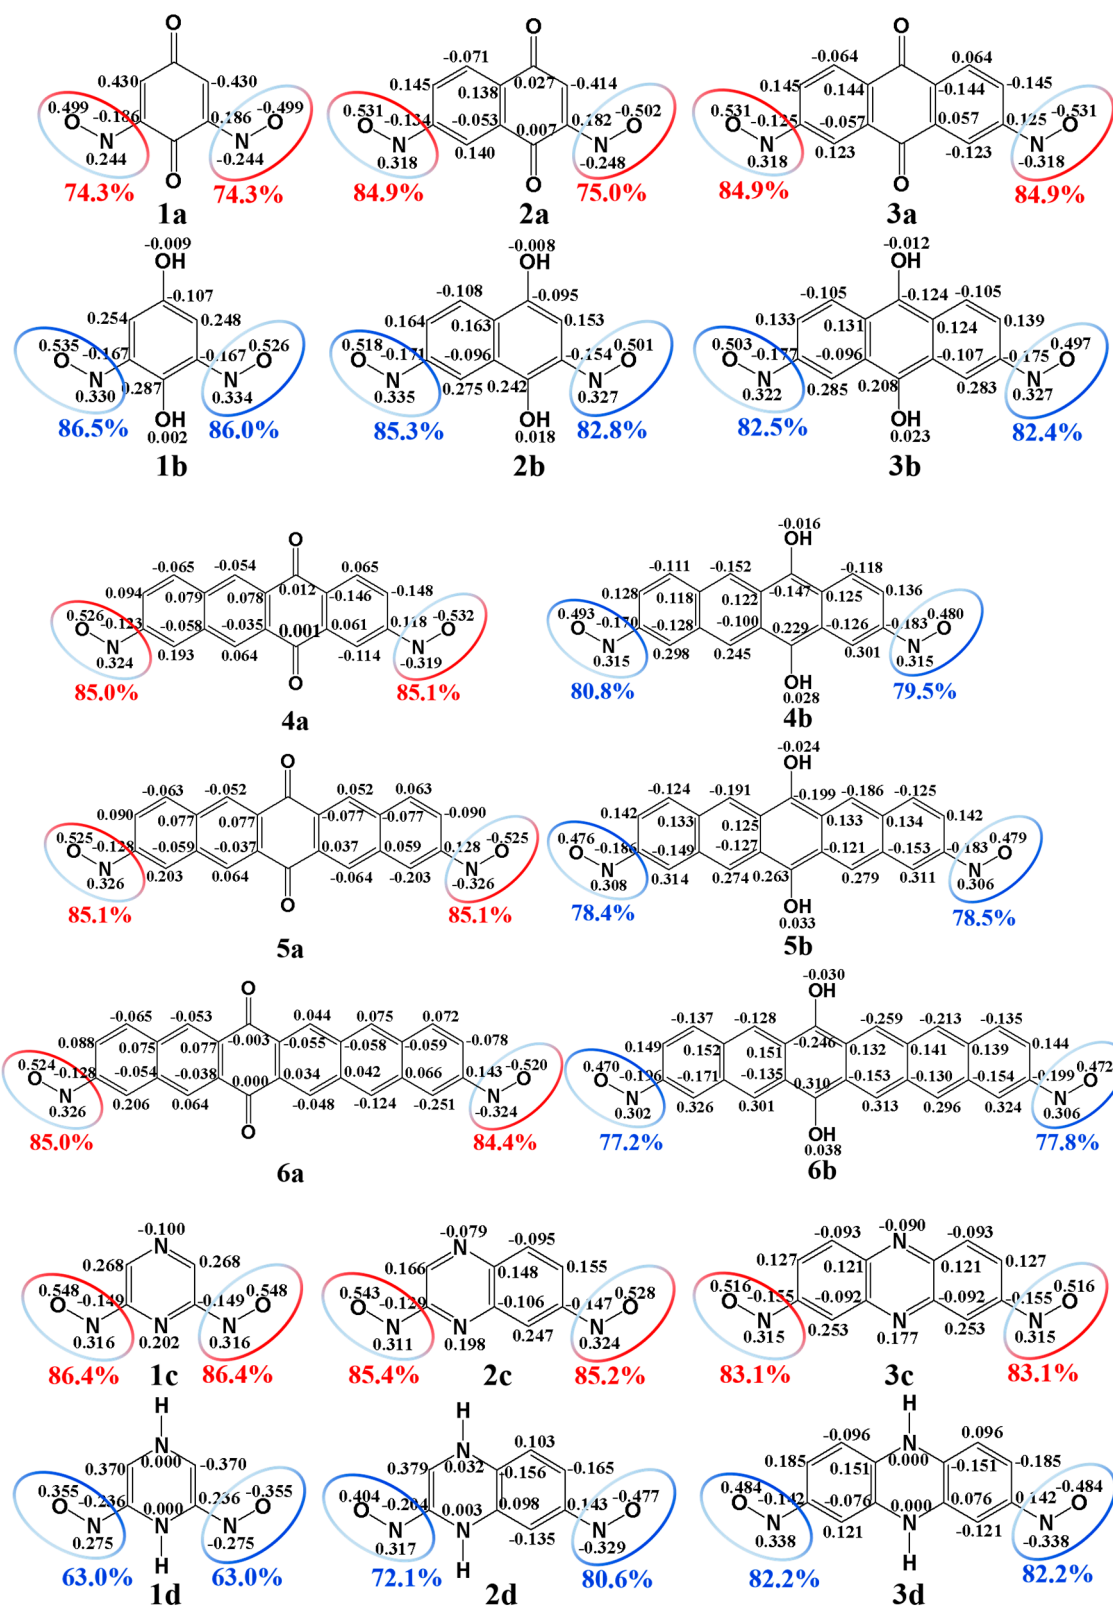

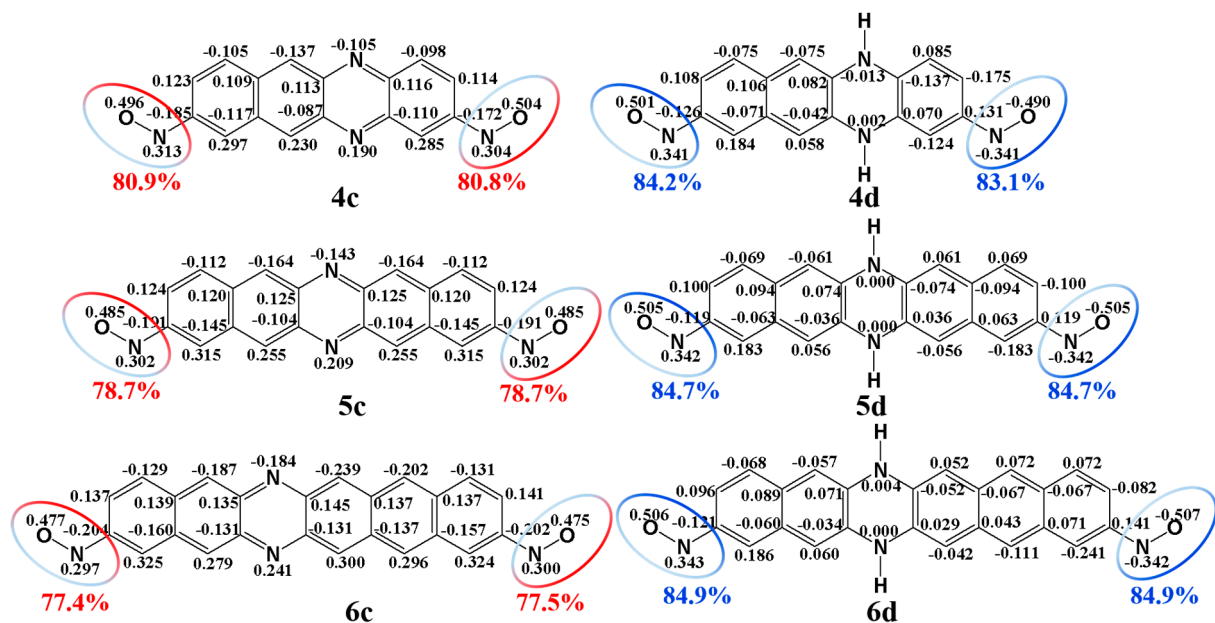

**Figure S2.** Comparison of spin polarization and the Mulliken atomic spin density distributions of all diradicals before and after dihydrogenation.

## 6. SOMO Plots and Spin Density Maps for All Diradicals

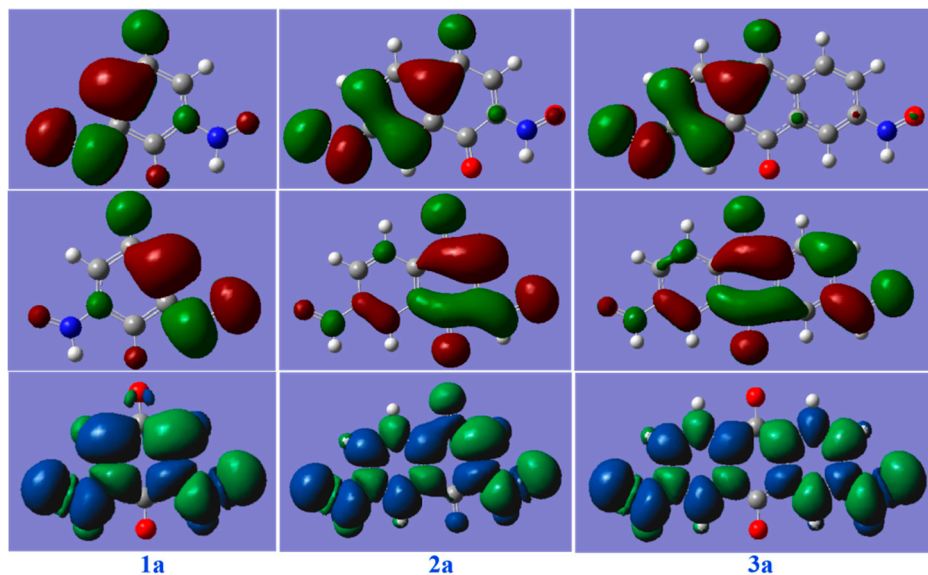

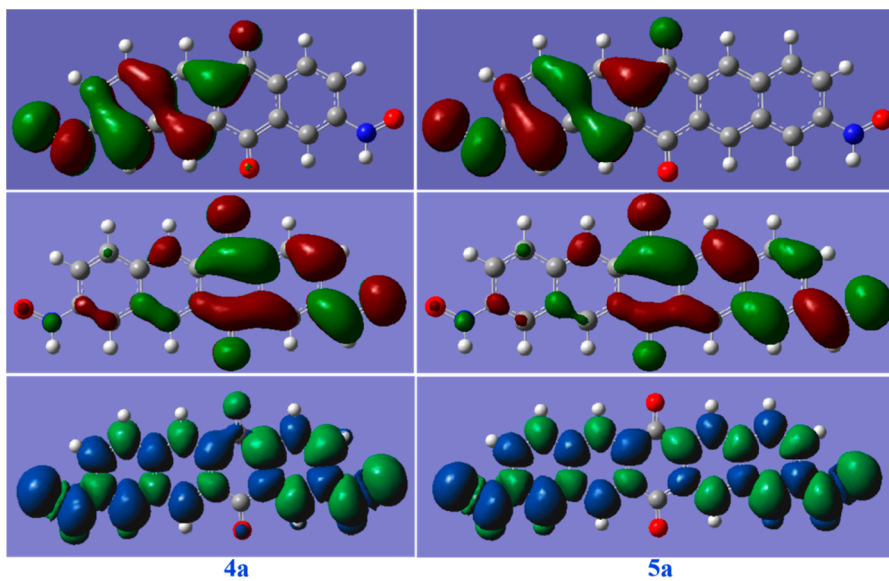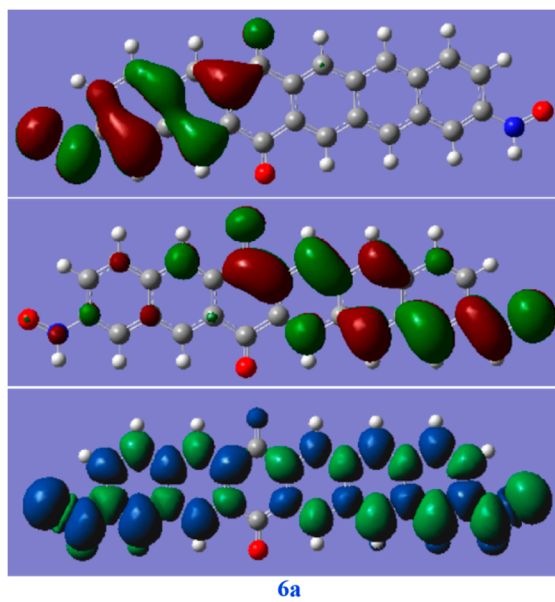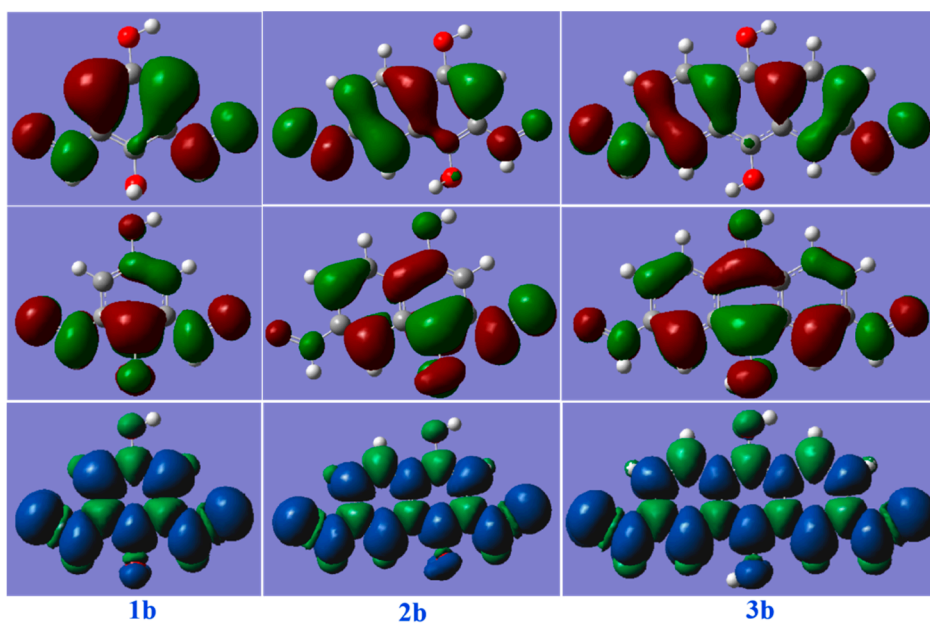

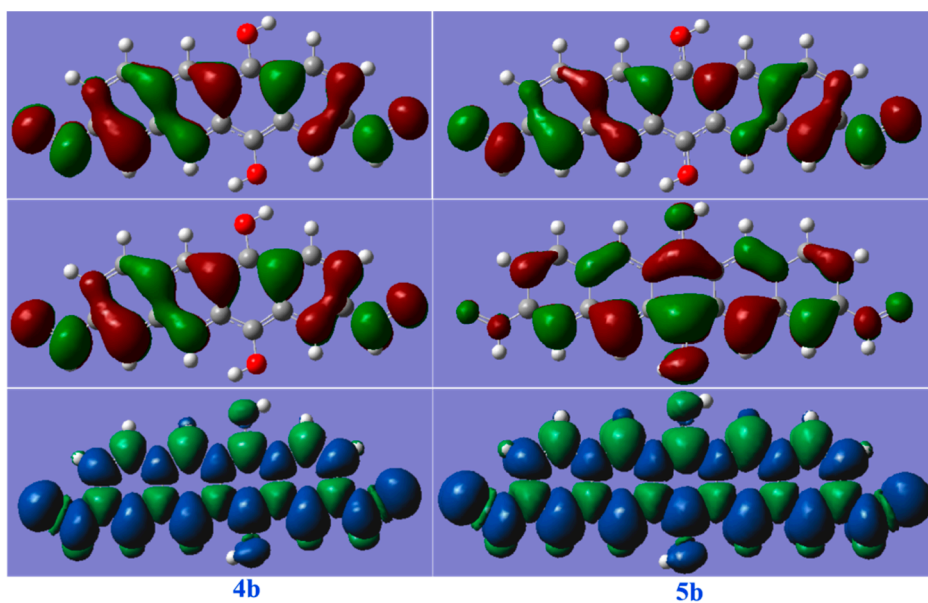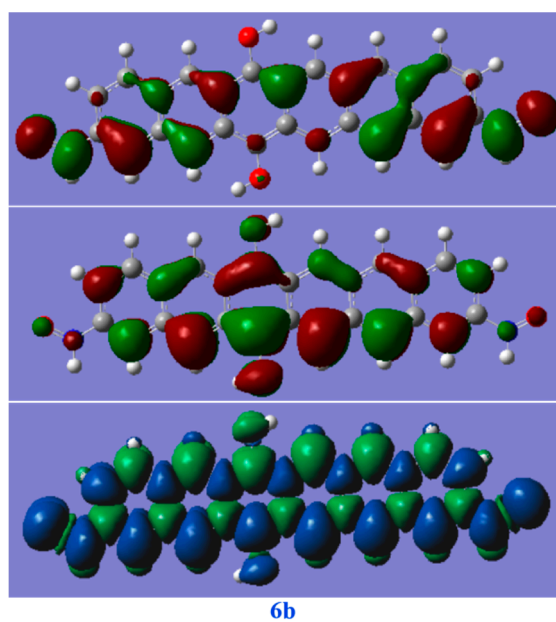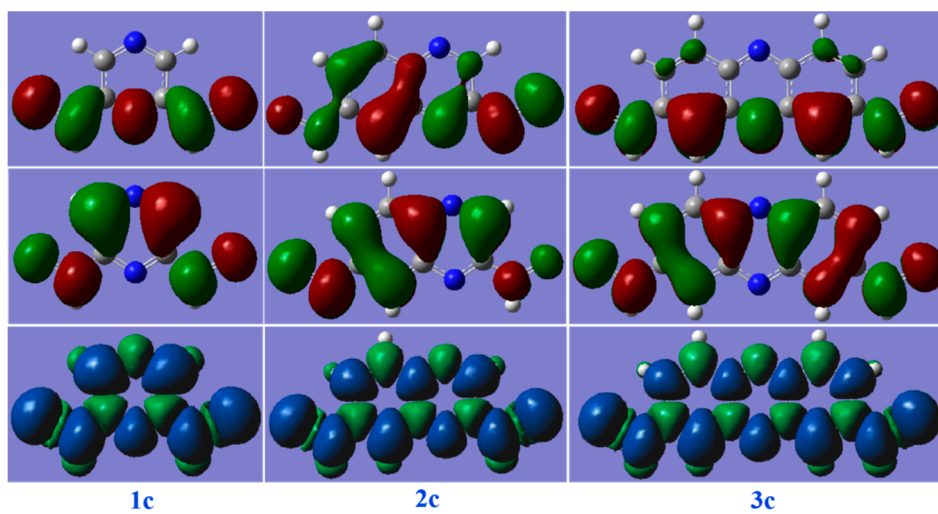

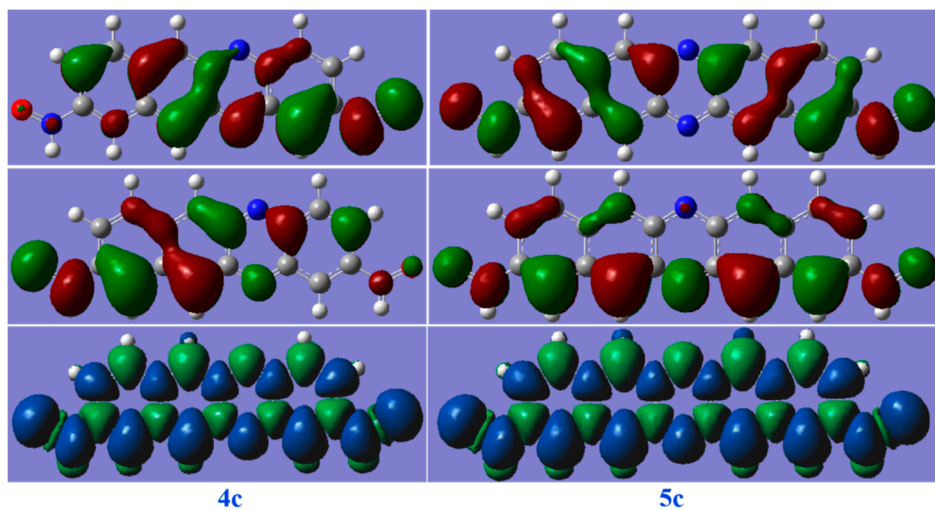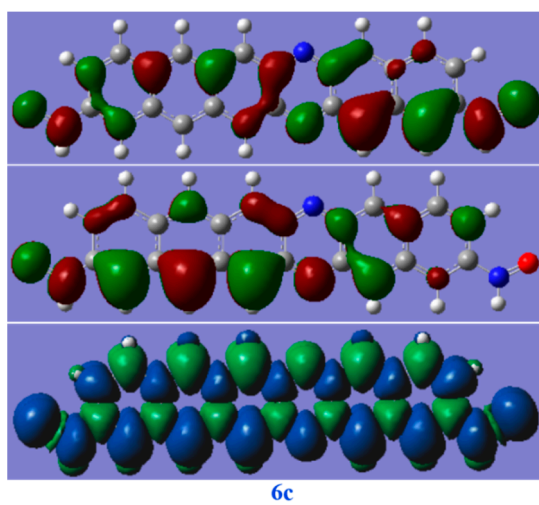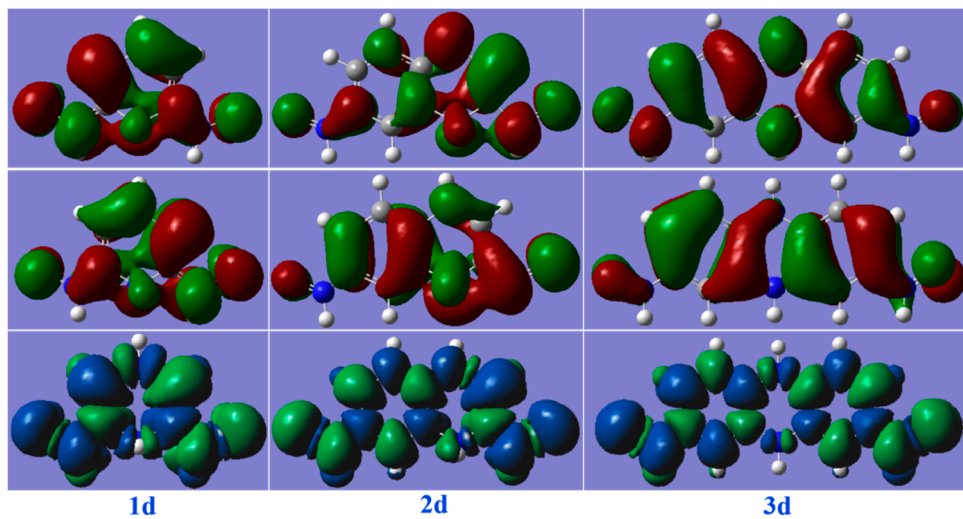

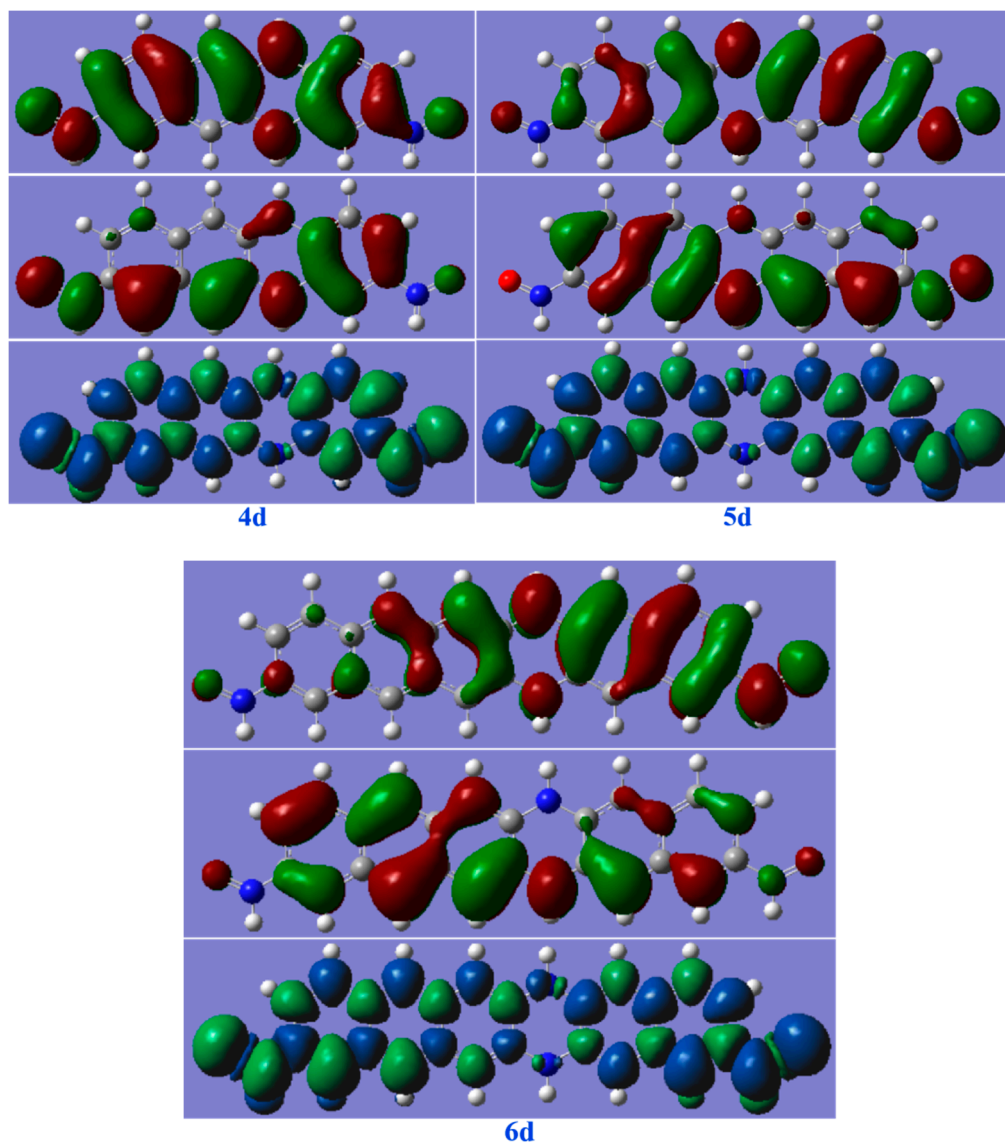

**Figure S3.** SOMOs (isovalue = 0.02) and spin density map (isovalue = 0.0004) of the ground states for the diradicals **1a**, **2a**, **3a**, **4a**, **5a**, **6a**, **1b**, **2b**, **3b**, **4b**, **5b**, **6b**, **1c**, **2c**, **3c**, **4c**, **5c**, **6c**, **1d**, **2d**, **3d**, **4d**, **5d** and **6d**.

## 7. Spin Alteration Plots for for Ten Couples of Diradicals

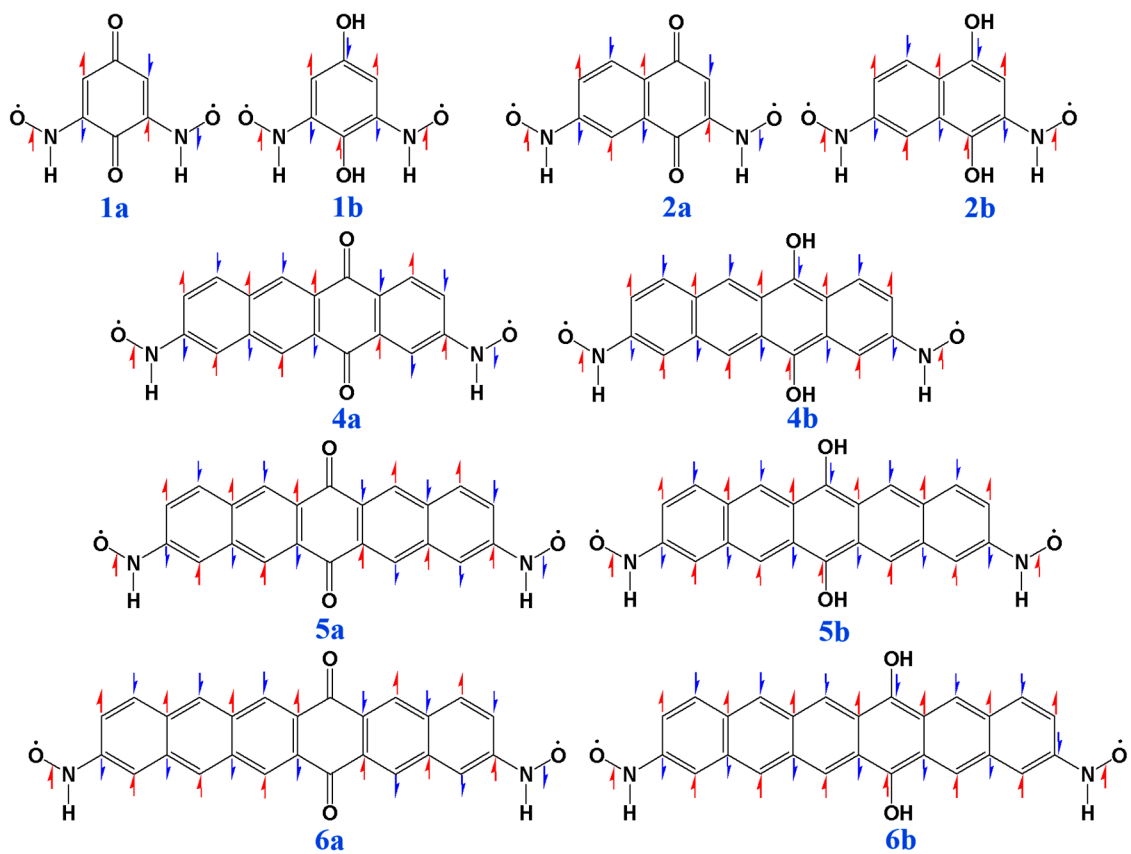

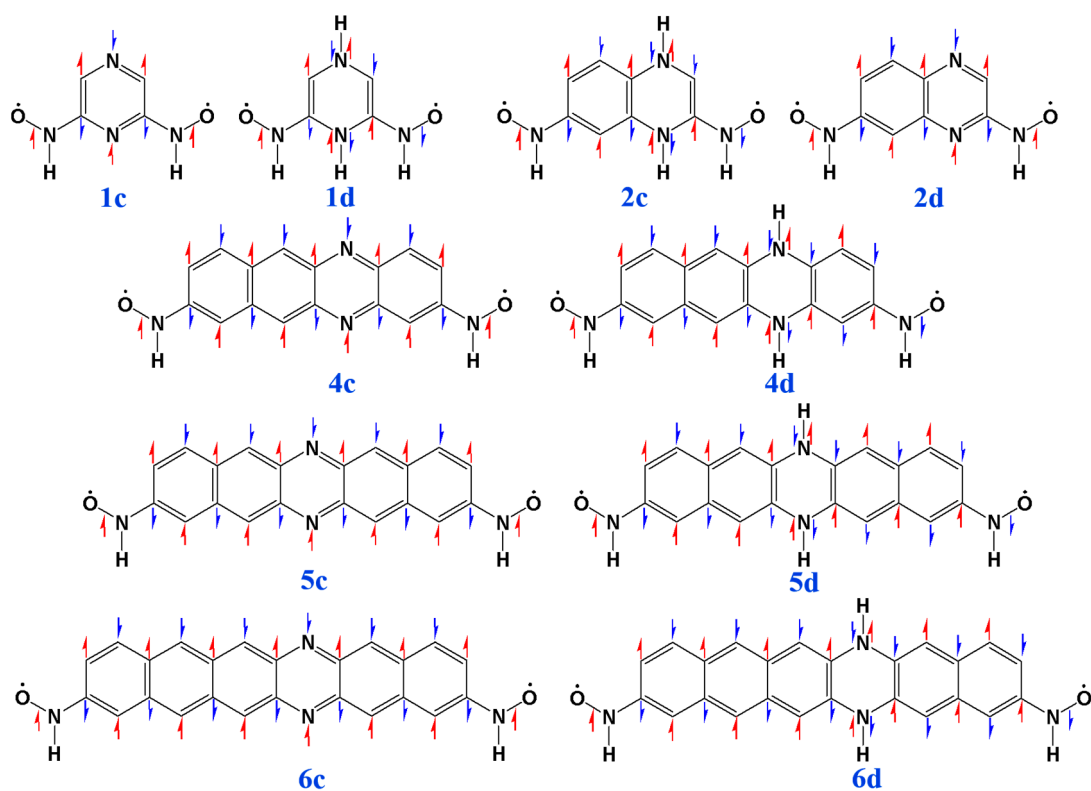

**Figure S4.** Scheme of spin alteration rule for ten couples of diradicals, including  $1a \leftrightarrow 1b$ ,  $2a \leftrightarrow 2b$ ,  $4a \leftrightarrow 4b$ ,  $5a \leftrightarrow 5b$ ,  $6a \leftrightarrow 6b$ ,  $1c \leftrightarrow 1d$ ,  $2c \leftrightarrow 2d$ ,  $4c \leftrightarrow 4d$ ,  $5c \leftrightarrow 5d$  and  $6c \leftrightarrow 6d$ .
